# Supplementary material
Source: PubMed Central journal article supplement (PMC6201120)
Supplement: zac011187615s1.pdf [file zac011187615s1.pdf]

# Identification of FDA-approved drugs as antivirulence agents targeting the *pqs* quorum sensing system of *Pseudomonas aeruginosa*

Francesca D'Angelo<sup>a</sup>, Valerio Baldelli<sup>a</sup>, Nigel Halliday<sup>b</sup>, Paolo Pantalone<sup>b</sup>, Fabio Polticelli<sup>a,c</sup>, Ersilia Fiscarelli<sup>d</sup>, Paul Williams<sup>b</sup>, Paolo Visca<sup>a</sup>, Livia Leoni<sup>a</sup>, Giordano Rampioni<sup>a#</sup>

<sup>a</sup> Department of Science, University Roma Tre, Rome, Italy; <sup>b</sup> Centre for Biomolecular Sciences and School of Life Sciences, University of Nottingham, Nottingham, UK; <sup>c</sup> National Institute of Nuclear Physics, Roma Tre Section, Rome, Italy; <sup>d</sup> Laboratory of Cystic Fibrosis Microbiology, Bambino Gesù Hospital, Rome, Italy.

## SUPPLEMENTAL MATERIAL

**Table S1.** Bacterial strains used in this study.

**Table S2.** Clinical isolates used in this study.

**Table S3.** Plasmids used in this study.

**Table S4.** Oligonucleotides used in this study.

**Figure S1.** PAO1/AQ-Rep coculture system.

**Figure S2.** Primary and secondary screens of the PHARMAKON library.

**Figure S3.** Effect of the *pqs* inhibitors on PAO1 growth.

**Figure S4.** Effect of the *pqs* inhibitors on constitutive bioluminescence.

**Figure S5.** Effect of the *pqs* inhibitors on the *las* and *rhl* QS systems.

**Figure S6.** Effect of clotrimazole on the mRNA level of *pqs*-controlled genes.

**Figure S7.** Competition assay between clofoctol and PQS for binding to PqsR.

**Figure S8.** Effect of clofoctol on *PlecA* activity.

**Figure S9.** Effect of clofoctol on AQ production in *P. aeruginosa* CF isolates grouped according to their antibiotic resistance profile.

**References of the Supplemental Material**

**Table S1.** Bacterial strains used in this study.

| Strains                           | Characteristics                                                                                                                                                                        | References |
|-----------------------------------|----------------------------------------------------------------------------------------------------------------------------------------------------------------------------------------|------------|
| <i>E. coli</i>                    |                                                                                                                                                                                        |            |
| S17.1 $\lambda$ pir               | conjugative strain for suicide plasmids.                                                                                                                                               | (1)        |
| <i>P. aeruginosa</i>              |                                                                                                                                                                                        |            |
| PAO1                              | Nottingham collection wild type strain.                                                                                                                                                |            |
| $\Delta pqsR$                     | PAO1 mutant strain with in frame clear deletion of the <i>pqsR</i> gene.                                                                                                               | (2)        |
| PAO1 <i>PpqsA::lux</i>            | PAO1 wild type strain carrying chromosomal insertion of the <i>PpqsA::lux</i> transcriptional fusion; Tc <sup>R</sup> .                                                                | (3)        |
| PAO1 mini-CTX:: <i>lux</i>        | PAO1 wild type strain carrying chromosomal insertion of the mini-CTX:: <i>lux</i> empty vector; Tc <sup>R</sup> .                                                                      | (3)        |
| $\Delta pqsA$ <i>PpqsA::lux</i>   | PAO1 mutant strain deleted in <i>pqsA</i> gene carrying chromosomal insertion of the <i>PpqsA::lux</i> transcriptional fusion; Tc <sup>R</sup> (named AQ-Rep).                         | (4)        |
| $\Delta lasI$ <i>PrsaL::lux</i>   | PA14 mutant strain deleted in <i>lasI</i> gene carrying chromosomal insertion of the <i>PrsaL::lux</i> transcriptional fusion (named PA14-R3).                                         | (5)        |
| $\Delta rhII$ <i>PrhIA::lux</i>   | PAO1 mutant strain deleted in <i>rhII</i> gene carrying chromosomal insertion of the <i>PrhIA::lux</i> transcriptional fusion; Km <sup>R</sup> (named C4-Rep).                         | (6)        |
| $\Delta pqsAH$ <i>PpqsA::lux</i>  | PAO1 double mutant strain deleted in <i>pqsA</i> and <i>pqsH</i> genes carrying chromosomal insertion of the <i>PpqsA::lux</i> transcriptional fusion; Tc <sup>R</sup> .               | (3)        |
| $\Delta pqsAHR$ <i>PpqsA::lux</i> | PAO1 triple mutant strain deleted in <i>pqsA</i> , <i>pqsH</i> and <i>pqsR</i> genes carrying chromosomal insertion of the <i>PpqsA::lux</i> transcriptional fusion; Tc <sup>R</sup> . | (7)        |
| PAO1 <i>PlecA::lux</i>            | PAO1 wild type strain carrying chromosomal insertion of the <i>PlecA::lux</i> transcriptional fusion; Tc <sup>R</sup> .                                                                | (8)        |
| $\Delta pqsR$ <i>PlecA::lux</i>   | PAO1 mutant strain deleted in <i>pqsA</i> gene carrying chromosomal insertion of the <i>PlecA::lux</i> transcriptional fusion; Tc <sup>R</sup> .                                       | This study |

**Table S2.** Clinical isolates used in this study.

| Isolate name <sup>a</sup> | Colonization <sup>b</sup> | Years of colonization | Phenotypic characteristics <sup>c</sup> | Antibiotics susceptibility <sup>d</sup> | Residual AQs production <sup>e</sup> |
|---------------------------|---------------------------|-----------------------|-----------------------------------------|-----------------------------------------|--------------------------------------|
| BG 4                      | first isolate             | -                     | frayed                                  | R                                       | 22                                   |
| BG 5                      | chronic early             | 2                     | frayed                                  | R                                       | 31                                   |
| BG 6                      | chronic middle            | 6                     | frayed                                  | R                                       | 35                                   |
| BG 7                      | first isolate             | -                     | circular                                | S                                       | 25                                   |
| BG 8                      | chronic early             | 2                     | circular                                | R                                       | 26                                   |
| BG 10                     | first isolate             | -                     | frayed                                  | S                                       | 14                                   |
| BG 11                     | chronic early             | 3                     | frayed                                  | R                                       | 44                                   |
| BG 12                     | chronic middle            | 5                     | frayed                                  | S                                       | 32                                   |
| BG 13                     | first isolate             | -                     | frayed                                  | MDR                                     | 44                                   |
| BG 17 <sup>e</sup>        | chronic early             | 2                     | circular                                | R                                       | 24                                   |
| BG 18 <sup>e</sup>        | chronic middle            | 6                     | circular                                | R                                       | 25                                   |
| BG 36                     | chronic early             | 3                     | rugose                                  | S                                       | 32                                   |
| BG 56                     | first isolate             | -                     | small                                   | R                                       | 57                                   |
| BG 76                     | chronic middle            | 7                     | mucoid                                  | R                                       | 23                                   |
| BG 80 <sup>e</sup>        | chronic middle            | 5                     | circular                                | R                                       | 87                                   |
| BG 92 <sup>e</sup>        | chronic late              | ≥15                   | small                                   | XDR                                     | 12                                   |
| BG 93                     | chronic late              | ≥15                   | rugose                                  | MDR                                     | np                                   |
| BG 96                     | chronic late              | ≥15                   | circular                                | R                                       | 58                                   |
| BG 97                     | chronic late              | ≥15                   | frayed                                  | XDR                                     | np                                   |
| BG 100 <sup>e</sup>       | chronic late              | ≥15                   | small                                   | R                                       | 67                                   |

<sup>a</sup> CF clinical isolates from the collection of the Bambino Gesù hospital, Rome, Italy.

<sup>b</sup> Different categories depending on the year of infection of the clinical isolates in the lung of individuals with cystic fibrosis: first isolate; chronic early (from 2 to 3 years); chronic middle (from 5 to 7 years); chronic late (equal or more than 15 years).

<sup>c</sup> Characteristics observed when clinical isolates were grown as colony biofilms.

<sup>d</sup> Criteria to define multi-drug resistant (MDR) and extensively-drug resistant (XDR) bacteria have been taken from European Centre for Diseases Prevention and Control (ECDC) web site (<http://ecdc.europa.eu/en/Pages/home.aspx>): MDR, resistant to one or more antibiotics belonging to at least three different classes; XDR, resistant to one or more antibiotics belonging to all classes except two or less; S, susceptible to all classes of antibiotics; R, resistant to one or more antibiotics belonging to less than three different classes.

<sup>e</sup> Residual production of AQs in samples treated with 100 μM clofoctol relative to untreated samples, considered as 100%. np, strains that do not produce detectable levels of AQs.

**Table S3.** Plasmids used in this study.

| Plasmids             | Characteristics                                                                                                                                                                                                                                                      | References |
|----------------------|----------------------------------------------------------------------------------------------------------------------------------------------------------------------------------------------------------------------------------------------------------------------|------------|
| pME6032              | pVS1-p15A shuttle expression (IPTG-inducible) vector; Tc <sup>R</sup> .                                                                                                                                                                                              | (9)        |
| pPqsR-6H             | pME6032 derivative for IPTG-inducible expression of the PqsR protein fused with a 6xHis tag; Tc <sup>R</sup> .                                                                                                                                                       | (7)        |
| pBBR1MCS-5           | shuttle vector for constitutive expression; Gm <sup>R</sup> .                                                                                                                                                                                                        | (10)       |
| pBBR- <i>pqsABCD</i> | pBBR1MCS-2 derivative for constitutive expression of PqsA, PqsB, PqsC and PqsD proteins in <i>P. aeruginosa</i> ; Km <sup>R</sup> .                                                                                                                                  | (11)       |
| pFD- <i>pqsABCD</i>  | pBBR1MCS-5 derivative for constitutive expression of PqsA, PqsB, PqsC and PqsD proteins in <i>P. aeruginosa</i> ; Gm <sup>R</sup> . This plasmid was obtained by cloning into pBBR1MCS-5 the SalI-SacI <i>pqsABCD</i> fragment extracted from pBBR- <i>pqsABCD</i> . | This study |
| pMRP9-1              | pMRP9 derivative for constitutive expression of GFP in <i>P. aeruginosa</i> ; Ap <sup>R</sup> /Cb <sup>R</sup> .                                                                                                                                                     | (12)       |

**Table S4.** Oligonucleotides used in this study.

| Name            | Sequence (5'-3')             |
|-----------------|------------------------------|
| FW <i>pqsA</i>  | GACCGCGAAGGACACACTAT         |
| FW <i>pqsA</i>  | TGAACAGATCGTCTTCCCGC         |
| FW <i>lecA</i>  | CAGGGCAGGTAACGTCGATT         |
| RV <i>lecA</i>  | CAACCCGGTATTGACCGGAA         |
| FW <i>pchR</i>  | CTCAGCGCACAGTTCCTTTC         |
| RV <i>pchR</i>  | CGAACACCTTGCGAAAGCC          |
| FW <i>pqsR</i>  | AACATGTTCCCTCCAGGTCATCG      |
| RV <i>pqsR</i>  | TGCGCATGTAAGGGATCAGG         |
| FW <i>pvdS</i>  | GGAACAACCTGTCTACCCGCA        |
| RV <i>pvdS</i>  | GTAGCTGAGCTGTGCCTTGA         |
| FW16S           | GAGAGTTTGATCCTGGCTCAG        |
| RV16S           | CTACGGCTACCTTGTTACGA         |
| FWP <i>pqsL</i> | TCCGCTCGAGGATCGTCACCGTCAACTG |
| RVP <i>pqsL</i> | TAACTGCAGCGTCATGGATGAGTCTCCG |

**Figure S1**

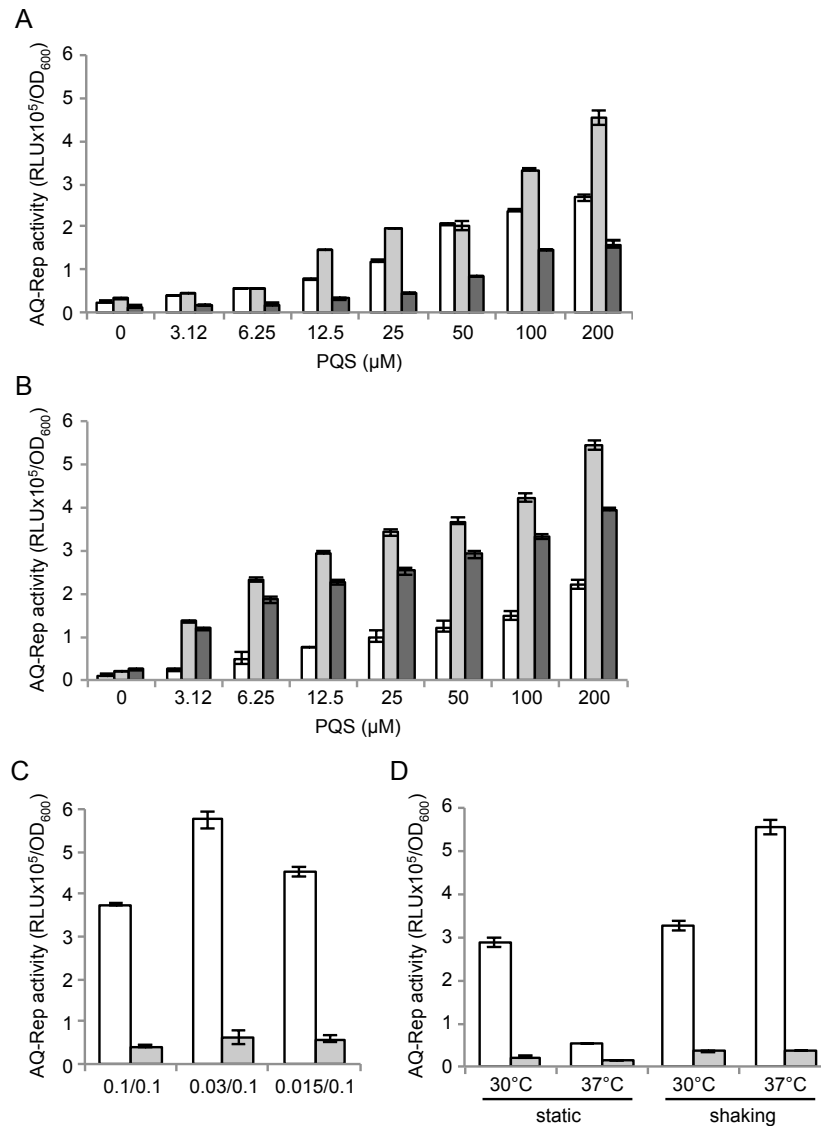

**Figure S1. Set up of the PAO1/AQ-Rep coculture system.**

(A) Response of the AQ-Rep biosensor after 3 h (white bars), 5 h (light-grey bars) and 7 h (dark-grey bars) incubation in LB supplemented with the indicated concentrations of PQS. (B) Activity of the AQ-Rep biosensor inoculated at starting optical density (OD<sub>600</sub>) of 0.4 (white bars), 0.1 (light-grey bars) and 0.025 (dark-grey bars) after 5 h incubation in LB supplemented with the indicated concentrations of PQS. (C) Activity of the AQ-Rep biosensor after 5 h co-incubation with PAO1 (white bars) or Δ*pqsA* (grey bars) strains at the indicated starting optical density (OD<sub>600</sub>). The first value refers to the PAO1 or Δ*pqsA* strains (OD<sub>600</sub> from 0.1 to 0.015), the second to the AQ-Rep biosensor (OD<sub>600</sub> = 0.1). (D) Activity of the PAO1/AQ-Rep (white bars) and Δ*pqsA*/AQ-Rep (grey bars) cocultures after 5 h incubation at 30°C or 37°C in static or shaking (200 rpm) conditions. Starting OD<sub>600</sub> was 0.1 for the AQ-Rep biosensor and 0.03 for the PAO1 and Δ*pqsA* strains. For (A)-(D), biosensor activity is reported as relative light units (RLU) normalized to cell density (OD<sub>600</sub>); the average of three independent experiments is reported with SD.

**Figure S2**

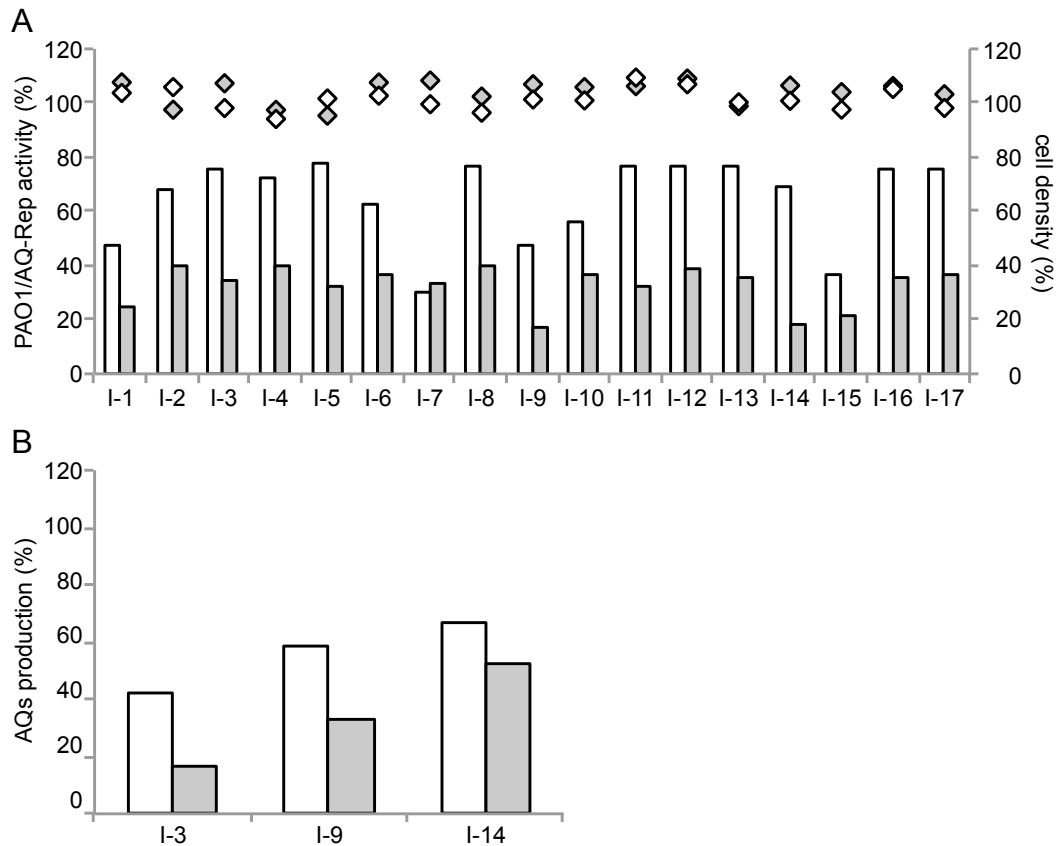

**Figure S2. Primary and secondary screens of the PHARMAKON library.**

**(A)** PAO1/AQ-Rep activity (bars) and cell density (diamonds) measured after 5 h incubation at 37°C in shaking conditions in LB supplemented with molecules of the PHARMAKON library, indicated with codes from inhibitor 1 (I-1) to inhibitor 17 (I-17), at 20 μM (white bars and diamonds) and 200 μM (grey bars and diamonds) concentration. PAO1/AQ-Rep activity and cell density measured in the presence of 0.2% and 2% DMSO were considered as 100%. **(B)** AQ production measured in supernatants of the PAO1 strain treated with PHARMAKON library compounds, clotrimazole (I-3), clofocetol (I-9) and miconazole (I-14) at 20 μM (white bars) and 200 μM (grey bars) concentration. Aqs were quantified using the AQ-Rep biosensor strain.

Figure S3

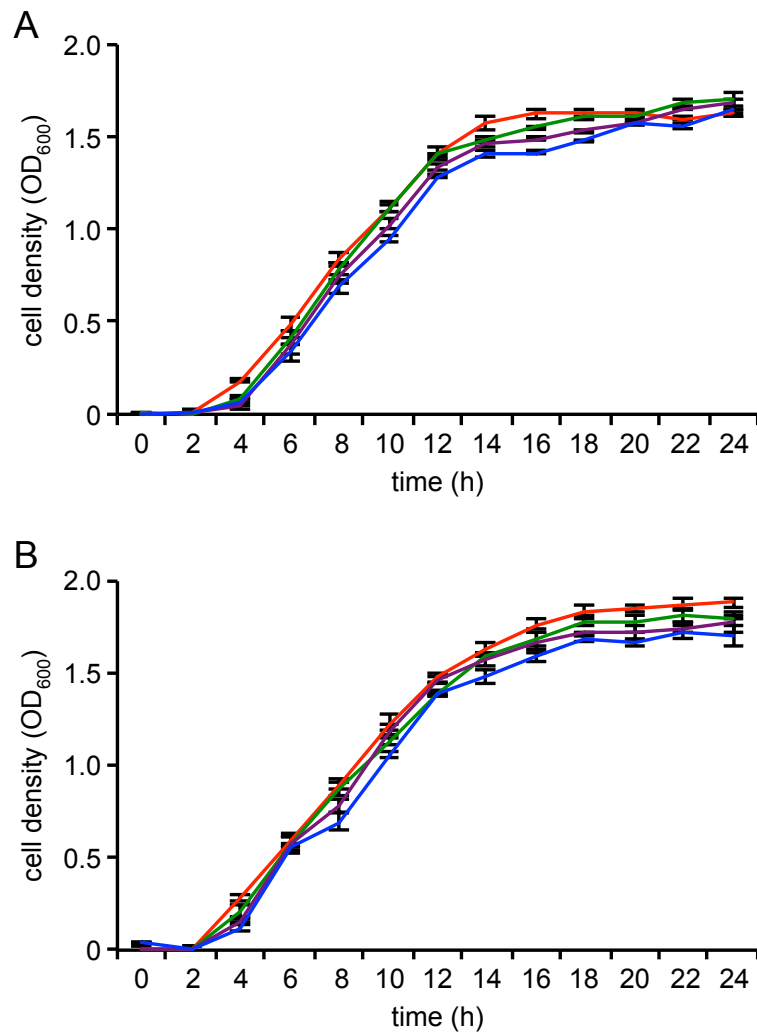

**Figure S3. Effect of the *pqs* inhibitors on PAO1 growth.**

Growth curves of PAO1 wild type (A) and of the biosensor strain AQ-Rep (B) incubated at 37°C in shaking conditions in LB supplemented with 200  $\mu$ M clotrimazole (blue), clofocinol (green), miconazole (purple) or with the corresponding amount of DMSO (red). The average of three independent experiments is reported with SD.

**Figure S4**

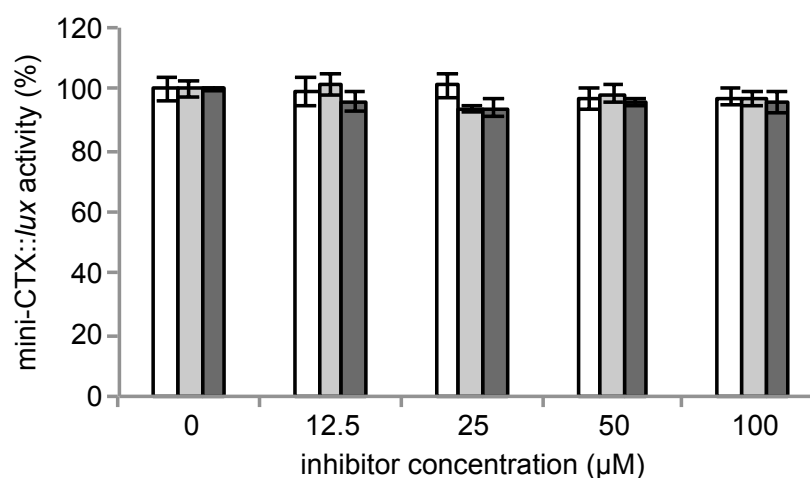

**Figure S4. Effect of the *pqs* inhibitors on constitutive bioluminescence.**

Percentage of light emitted by the PAO1 strain carrying the mini-CTX::lux empty vector grown at 37°C in shaking conditions in LB supplements with 200 µM clotrimazole (white bars), clofocetol (light-grey bars), or miconazole (dark-grey bars). Bioluminescence of the same strain grown in the presence of DMSO was considered as 100%. The average of three independent experiments is reported with SD.



Figure S5

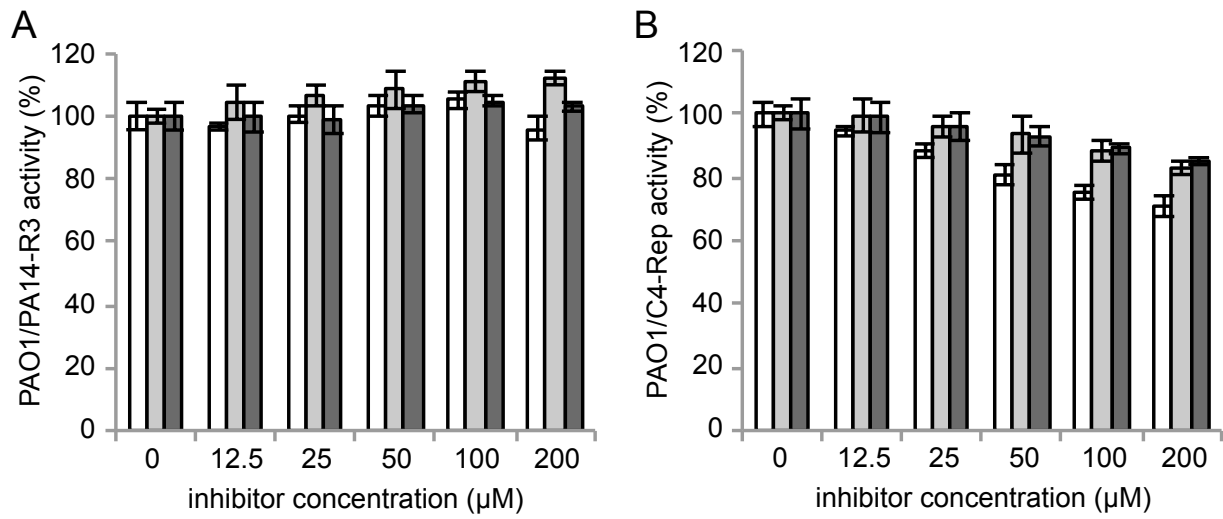

**Figure S5. Effect of the *pqs* inhibitors on the *las* and *rhl* QS systems.**

Effect of clotrimazole (white bars), clofocetol (light-grey bars) and miconazole (dark-grey bars) on the PAO1/PA14-R3 (A) and PAO1/C4-Rep (B) coculture systems. PA14-R3: *las*-specific biosensor strain PA14  $\Delta lasI$  *PrsaL::luxCDABE* (5); C4-Rep: *rhl*-specific biosensor strain PAO1  $\Delta rhlI$  *PrhIA::luxCDABE* (6). Bioluminescence of untreated cocultures normalized to cell density is considered as 100%.

Figure S6

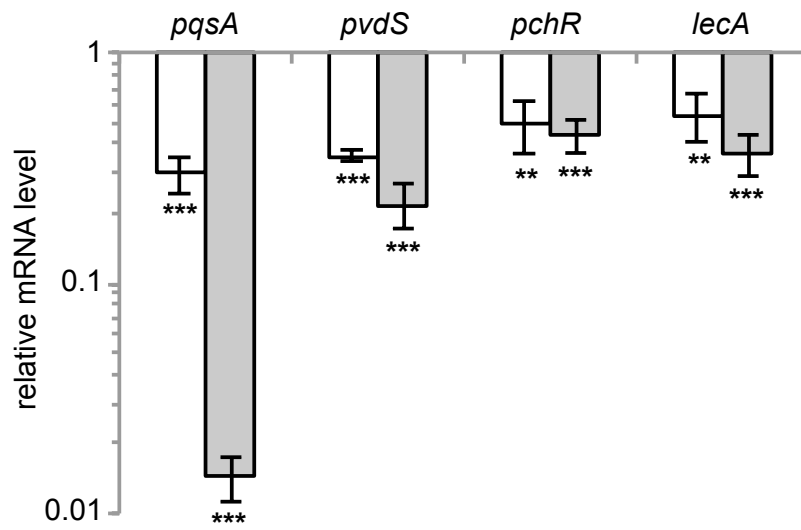

**Figure S6. Effect of clotrimazole on the mRNA level of *pqs*-controlled genes.**

Real Time RT-PCR analysis showing mRNA level of the indicated genes in PAO1 treated with 100  $\mu$ M clotrimazole (white bars) and in  $\Delta pqsR$  (grey bars) relative to untreated PAO1. The average of three independent experiments is reported with SD. \*\*,  $p < 0.01$ ; \*\*\*,  $p < 0.001$  (ANOVA).

**Figure S7**

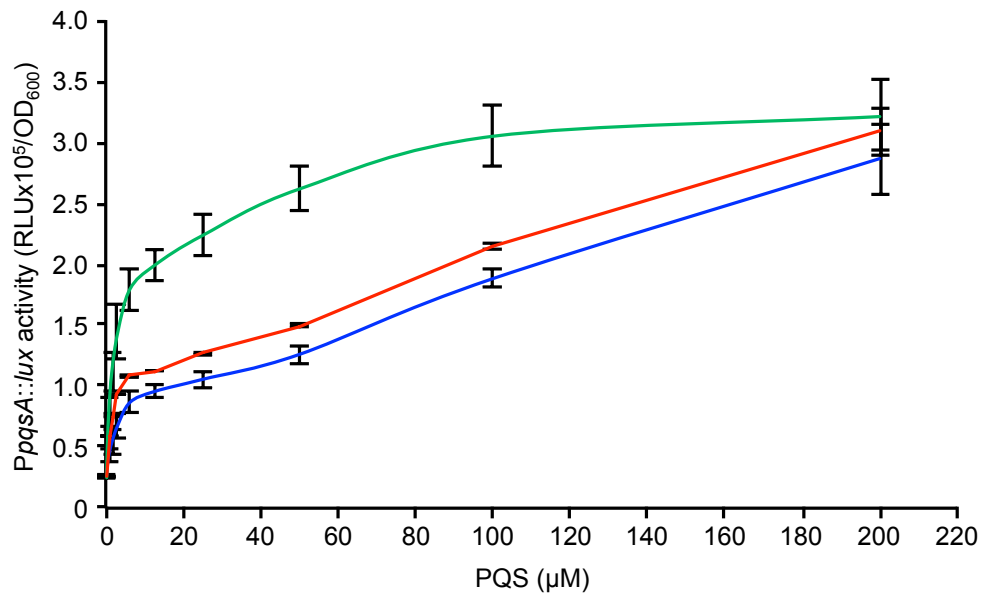

**Figure S7. Competition assay between clofoctol and PQS for binding to PqsR.**

*PqsA::lux* activity measured in the AQ-Rep biosensor grown in LB supplemented with different concentrations of PQS in the absence (green) or in the presence of 12.5 μM (red) or 50 μM (blue) clofoctol. Promoter activity is reported as relative light units (RLU) normalized to cell density (OD<sub>600</sub>).

**Figure S8**

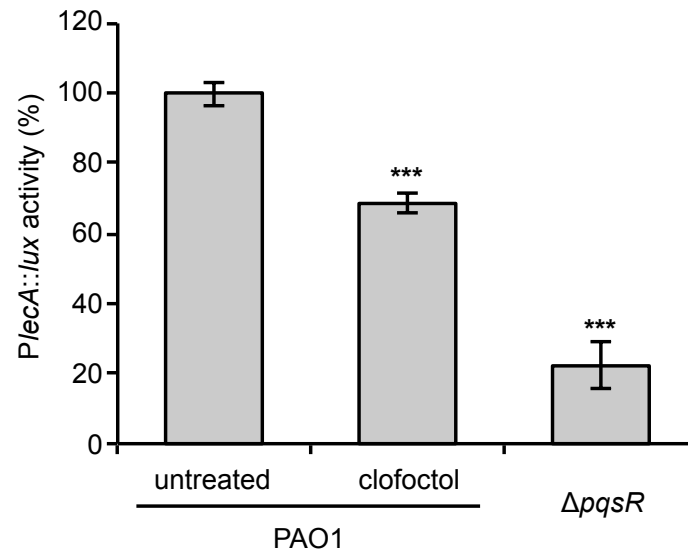

**Figure S8. Effect of clofoctol on *PlecA* activity.**

Activity of the *PlecA* promoter in PAO1 cultures grown in LB supplemented with DMSO (untreated) or with 100  $\mu$ M clofoctol, and in the  $\Delta pqsR$  culture grown in LB supplements with DMSO. *PlecA* activity in untreated PAO1 is considered as 100%. The average of three independent experiments is reported with SD. \*\*\*,  $p < 0.001$  (ANOVA).

**Figure S9**

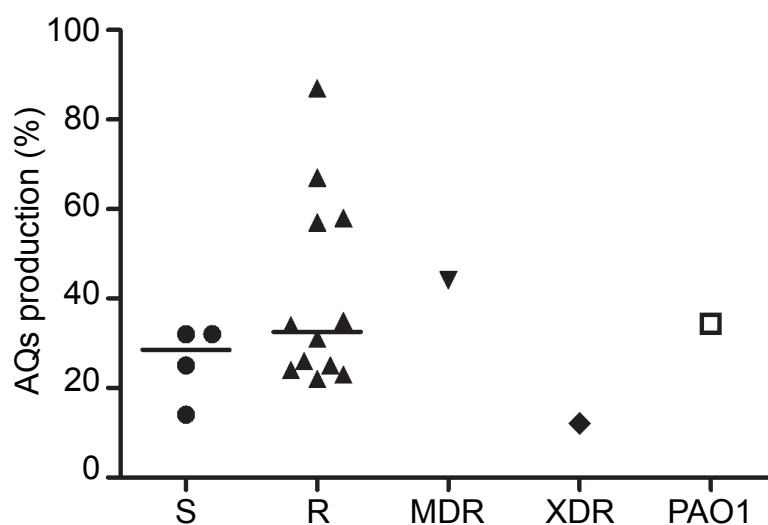

**Figure S9. Effect of clofoctol on AQ production in *P. aeruginosa* CF isolates grouped according to their antibiotic resistance profile.**

Dot plot showing the inhibition of AQ production in *P. aeruginosa* CF isolates (filled symbols) and *P. aeruginosa* PAO1 (open square) treated with 100  $\mu$ M clofoctol, relative to the untreated samples considered as 100%. Black lines represent the median values: S, 28.4%; R, 32.6%. AQ production in the MDR, XDR and PAO1 strains were 43.5%, 11.6% and 34.3%, respectively. Differences between the median values are not statistically significant. Mean results of three independent experiments are reported.

## References of the Supplemental Material

1. Simon R, Quandt J, Klipp W. 1983. A broad host range mobilization system for *in vivo* genetic engineering: transposon mutagenesis in Gram-negative bacteria. *Nat Biotechnol* 1:784-791.
2. Rampioni G, Pustelny C, Fletcher MP, Wright VJ, Bruce M, Rumbaugh KP, Heeb S, Cámara M, Williams P. 2010. Transcriptomic analysis reveals a global alkyl-quinolone-independent regulatory role for PqsE in facilitating the environmental adaptation of *Pseudomonas aeruginosa* to plant and animal hosts. *Environ Microbiol* 12:1659-1673.
3. Fletcher MP, Diggle SP, Crusz SA, Chhabra SR, Cámara M, Williams P. 2007. A dual biosensor for 2-alkyl-4-quinolone quorum-sensing signal molecules. *Environ Microbiol* 9:2683-2693.
4. Diggle SP, Matthijs S, Wright VJ, Fletcher MP, Chhabra SR, Lamont IL, Kong X, Hider RC, Cornelis P, Cámara M, Williams P. 2007. The *Pseudomonas aeruginosa* 4-quinolone signal molecules HHQ and PQS play multifunctional roles in quorum sensing and iron entrapment. *Chem Biol* 14:87-96.
5. Massai F, Imperi F, Quattrucci S, Zennaro E, Visca P, Leoni L. 2011. A multitask biosensor for micro-volumetric detection of *N*-3-oxo-dodecanoyl-homoserine lactone quorum sensing signal. *Biosens Bioelectron* 26:3444-3449.
6. Imperi F, Massai F, Ramachandran Pillai C, Longo F, Zennaro E, Rampioni G, Visca P, Leoni L. 2013. New life for an old drug: the anthelmintic drug niclosamide inhibits *Pseudomonas aeruginosa* quorum sensing. *Antimicrob Agents Chemother* 57:996-1005.
7. Ilangovan A, Fletcher M, Rampioni G, Pustelny C, Rumbaugh K, Heeb S, Cámara M, Truman A, Chhabra SR, Emsley J, Williams P. 2013. Structural basis for native agonist and synthetic inhibitor recognition by the *Pseudomonas aeruginosa* quorum sensing regulator PqsR (MvfR). *PLoS Pathog* 9:e1003508.
8. Winzer K, Falconer C, Garber NC, Diggle SP, Cámara M, Williams P. 2000. The *Pseudomonas aeruginosa* lectins PA-IL and PA-IIL are controlled by quorum sensing and by RpoS. *J Bacteriol* 182:6401-6411.
9. Heeb S, Blumer C, Haas D. 2002. Regulatory RNA as mediator in GacA/RsmA-dependent global control of exoproduct formation in *Pseudomonas fluorescens* CHA0. *J Bacteriol* 184:1046-1056.
10. Kovach ME, Elzer PH, Hill DS, Robertson GT, Farris MA, Roop RM 2<sup>nd</sup>, Peterson KM. 1995. Four new derivatives of the broad-host-range cloning vector pBBR1MCS, carrying different antibiotic-resistance cassettes. *Gene* 166:175-176.

11. Niewerth H, Bergander K, Chhabra SR, Williams P, Fetzner S. 2011. Synthesis and biotransformation of 2-alkyl-4(*IH*)-quinolones by recombinant *Pseudomonas putida* KT2440. *Appl Microbiol Biotechnol* 91:1399-1408.
12. Davies DG, Parsek MR, Pearson JP, Iglewski BH, Costerton JW, Greenberg EP. 1998. The involvement of cell-to-cell signals in the development of a bacterial biofilm. *Science* 280:295-298.
